# Supplementary material
Source: PubMed Central journal article supplement (PMC5818002)
Supplement: DEV157446supp.pdf [file DEV157446supp.pdf]

## Supplemental Information

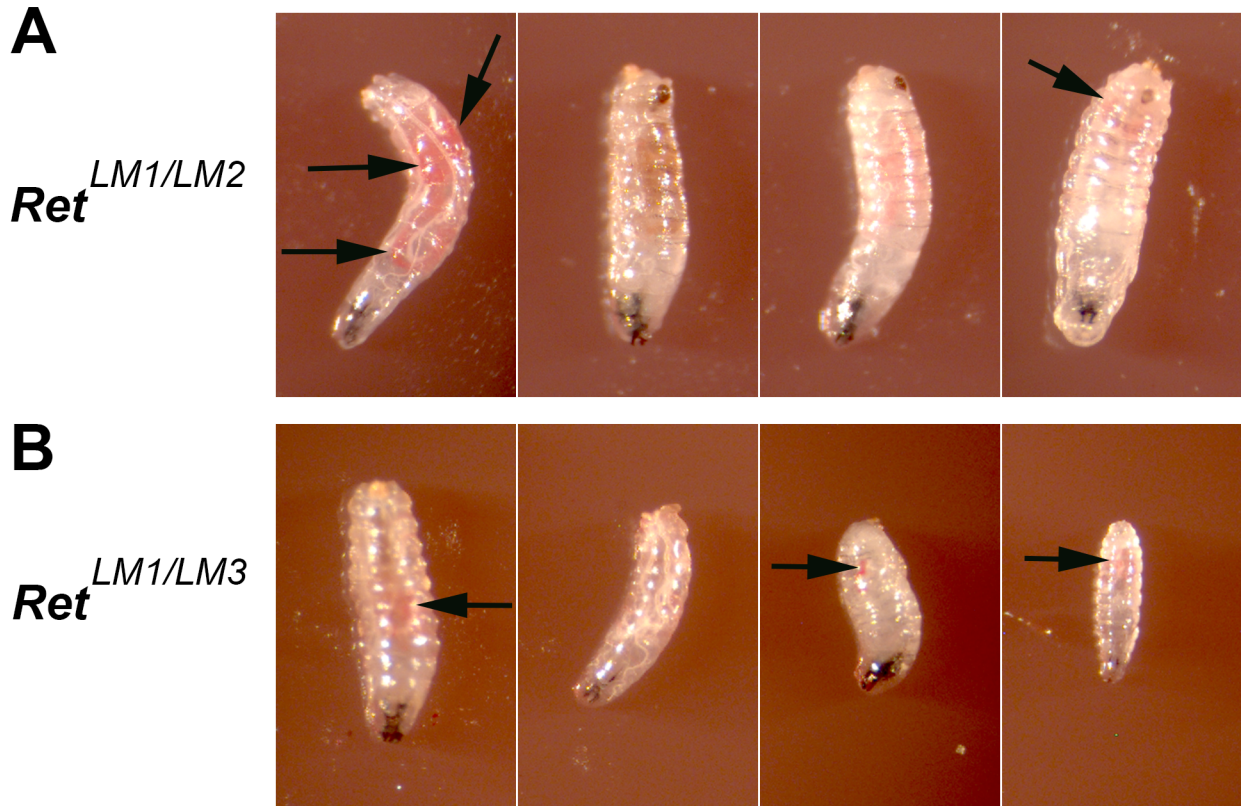

### Supplemental Figure 1. Feeding defects in CRISPR allele combinations.

CRISPR alleles of *Ret* were crossed and the homozygous larvae examined for feeding defects. Homozygous larvae were selected on the basis of foraging behavior (moving away from the central food source). Larvae are oriented with the anterior down (the head is distinguished by black mouthhooks). (A) *Ret*<sup>LM1</sup>/*Ret*<sup>LM2</sup> larvae showing a range of food ingestion as revealed by pink coloring inside the larvae. The food is most visible in the leftmost larvae (arrows) and the tubular nature of the midgut is evident towards the anterior. Other larvae show markedly reduced levels of food intake; n=55. (B) *Ret*<sup>LM1</sup>/*Ret*<sup>LM2</sup> larvae showing a range of food ingestion (arrows) and retarded growth; n=40.

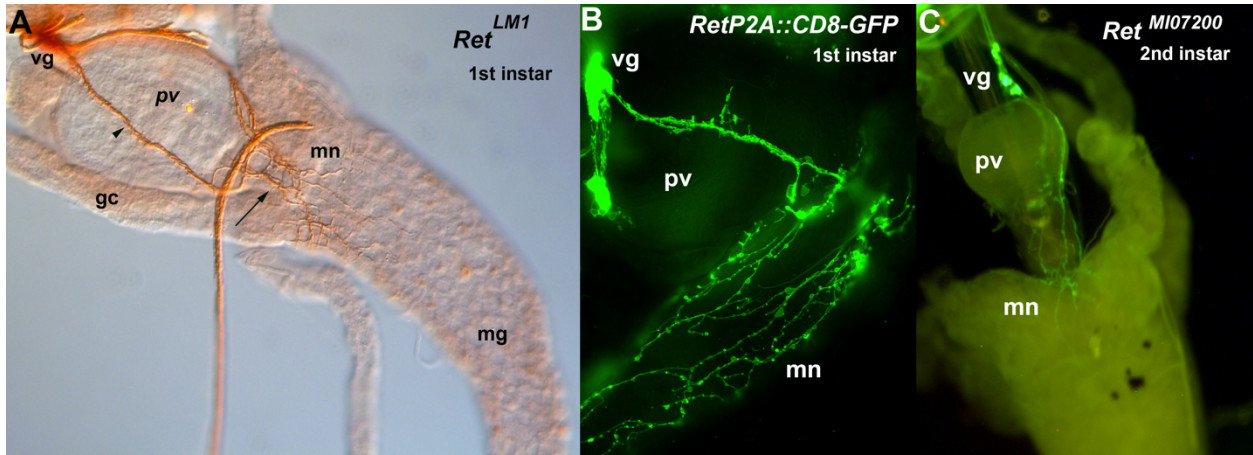

### Supplemental Figure 2. Larval midgut axons

(A) *Ret<sup>LM1</sup>* homozygous first instar larva stained with 22c10 to reveal the midgut axons (mn) and the ventricular ganglion (vg). The midgut axons are tightly fasciculated crossing the proventriculus (pv, arrowhead), but rapidly start branching on encountering the anterior midgut and do not project very far into the midgut (mg). The prep is partially obscured a 22c10 positive bundle from another part of the nervous system (entering from the bottom of the panel and projecting vertically). (B) Expression of *RetP2A-GAL4* in a first instar larva visualized with *UAS-CD8-GFP*. Although wild type, a minor amount of branching can be seen as the midgut axons cross the proventriculus, although this might be a difference between CD8-GFP and 22c10 antigen distribution. Varicosities in the mn are clearly visible. There is no detectable expression in the underlying gut tissues. (C) A transposon insertion into the *Ret* gene (*MI07200*) appears to act as a transcriptional fusion, expressing GFP in the pattern of the *Ret* mRNA in the embryo and larvae. Fluorescence in a second instar larva (bright green) is visible in the vg and mn, but there is no fluorescence in the underlying tissues. Lipid auto-fluorescence from the gut tissue is visible as a dull yellow-green that is distinct from GFP fluorescence.

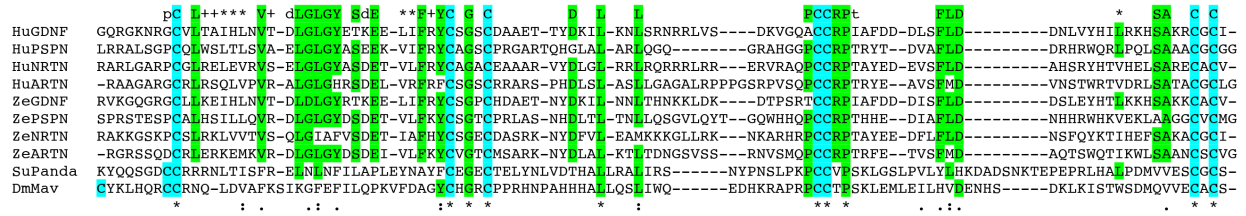

### Supplemental Figure 3. Alignment of GDNF family proteins with Maverick.

CLUSTAL alignment of human (Hu) and zebrafish (Ze) GDNF, Neurturin (NRTN), Artemin (ARTN) and Persephin (PSPN) with *Drosophila* Maverick (DmMav) and *Paracentrotus lividus* Panda/Maverick (SuPanda). Conserved cysteines are highlighted in blue. Highly conserved amino acids in the GDNF family are in green and indicated above the alignment. Conservation between GDNF and Mav proteins are shown below. Asterisks indicate fully conserved residues, colons residues of strongly similar properties, periods are weakly similar residues.

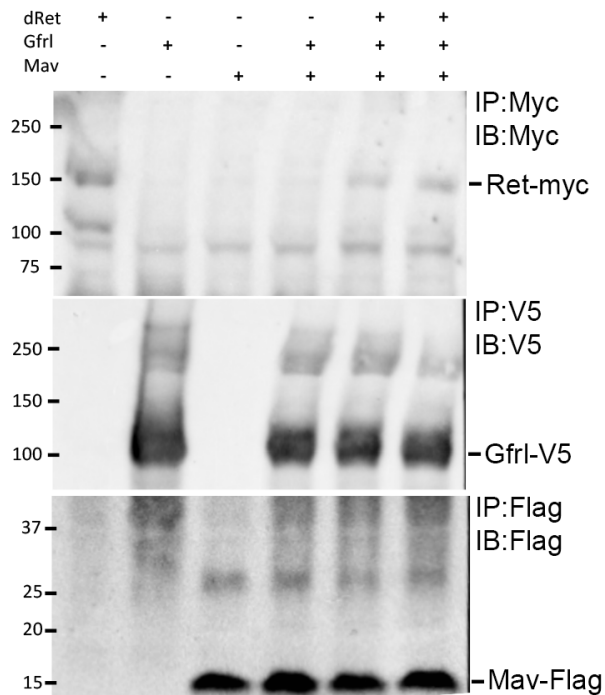

#### Supplemental Figure 4. Cell culture expression of Ret, Gfrl and Mav.

Full-length Ret, Gfrl, and Mav proteins were expressed in HEK293 and immunoprecipitated using the following epitope tags: Ret – C-terminal myc tag, Gfrl – N-terminal V5 tag, Mav – C-terminal DYK/Flag tag. Observed proteins sizes were 150kDa, 100kDa, and 14.2kDa respectively. Despite sample preparation by boiling in the presence of SDS, apparent dimers for Gfrl and Mav can be observed.

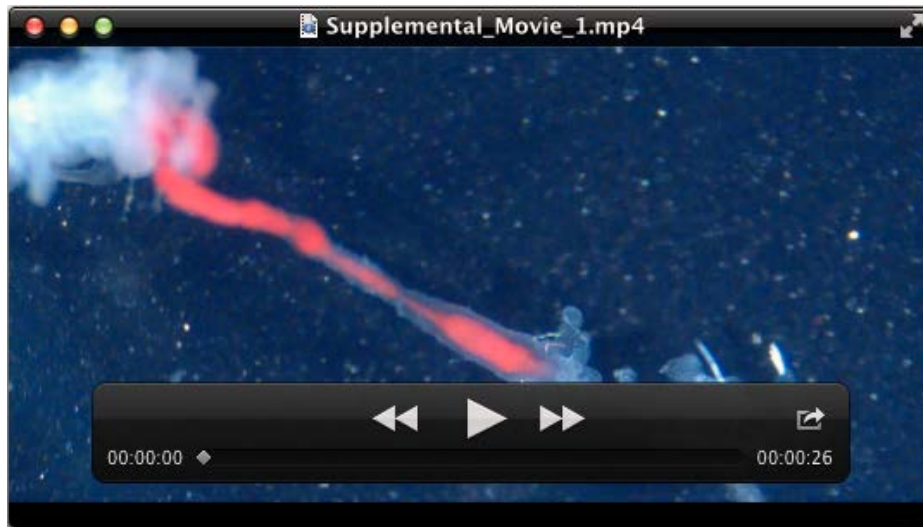

**Supplemental Movie 1. Peristalsis of a dissected  $w^{118}$  third instar midgut.**

A  $w^{118}$  third instar midgut was dissected in Schneider's medium and pinned in place. The head is to the right. Yeast colored with Carmine Red is visible in the midgut (center) and also the esophagus (thinner section to the right disappearing into the head tissues). The proventriculus is a bulge connected to the thin esophagus in center right and identifiable by the tentacle like gastric caeca projecting from it. Pink food is not retained in the proventriculus. The most visible peristaltic contractions initiate just posterior to the proventriculus and propagate as a wave down the midgut. This region is innervated by the larval axons. Contractions are also visible in the head and esophagus to the right.



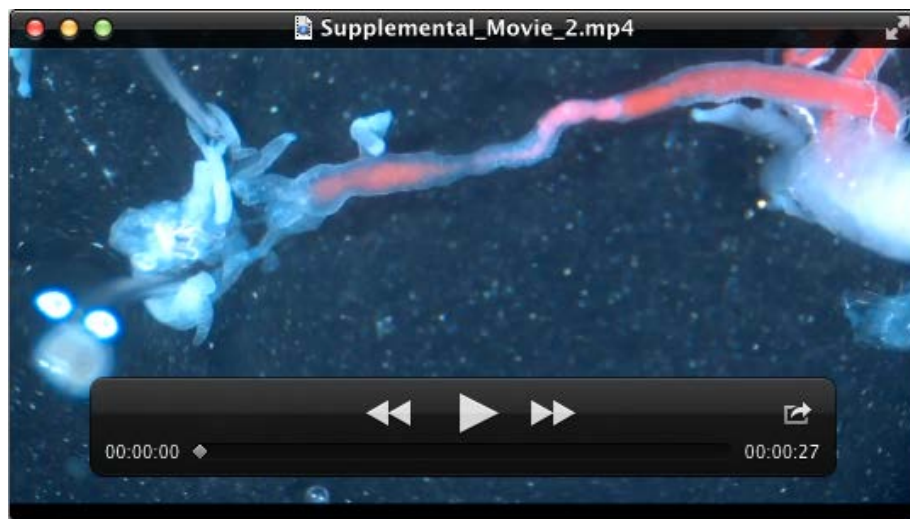

**Supplemental Movie 2. Peristalsis of a dissected *Ret* third instar midgut.**

A *Ret<sup>LM1</sup>* mutant third instar larval midgut dissected and observed. The head is to the left with two metal pins inserted into it. The thin esophagus is visible connecting the head to the proventriculus and pink food is visible immediately posterior in the start of the midgut. Peristaltic contractions are visible in the esophagus, proventriculus and the start of the midgut but fail to propagate as a wave into the rest of the midgut.

| Host and target                                  | Working dilution | Company                                    |
|--------------------------------------------------|------------------|--------------------------------------------|
| 22c20 mouse anti-futsch                          | 1:10             | DSHB, University of Iowa, IA               |
| AlexaFluro Bovine anti-goat<br>488 (805-545-180) | 1:1000           | Jackson Immuno Research, West<br>Grove, PA |
| AlexaFluro Goat anti-mouse<br>568 (ab175473 )    | 1:1000           | Abcam, Cambridge, MA                       |
| AlexaFluro Goat anti-rabbit<br>594 (111-585-144) | 1:1000           | Jackson Immuno Research, West<br>Grove, PA |
| Donkey anti-goat: Biotin (705-<br>065-147)       | 1:250            | Jackson Immuno Research, West<br>Grove, PA |
| Donkey anti-goat: HRP (705-<br>035-147)          | 1:1000           | Jackson Immuno Research, West<br>Grove, PA |
| Donkey anti-mouse: Biotin<br>(715-065-150)       | 1:250            | Jackson Immuno Research, West<br>Grove, PA |
| Donkey anti-rabbit: Biotin<br>(711-065-152)      | 1:500            | Jackson Immuno Research, West<br>Grove, PA |
| Goat anti-flag/DDDDK<br>(ab1257)                 | 1:1000           | Abcam, Cambridge, MA                       |
| Goat anti-mouse: HRP (115-<br>035-146)           | 1:1000           | Jackson Immuno Research, West<br>Grove, PA |
| Goat anti-rabbit: HRP (111-<br>035-144)          | 1:1000           | Jackson Immuno Research, West<br>Grove, PA |
| Mouse anti-c-myc (ab32)                          | 1:500            | Abcam, Cambridge, MA                       |
| Mouse anti-V5 (R96025)                           | 1:1000           | Invitrogen, Carlsbad, CA                   |
| Rabbit anti- $\beta$ galactosidase<br>(559762)   | 1:5000           | MP Biomedicals, Solon, OH                  |
| Rabbit anti-dRet (NP-477044)                     | 1:500            | Genscript Biotech Corp.,<br>Piscataway, NJ |
| Rabbit anti-GFP (A11122)                         | 1:500            | Life technologies, Carlsbad, CA            |

**Supplemental Table 1. Antibodies used in the study.**

| Name             | Sequence (5`->3`)        | Application/Construct                   |
|------------------|--------------------------|-----------------------------------------|
| Ret_ex3-1_F      | GTCGTGTTTACTTTCCCACCACGT | Ret gRNA 3 oligo <sup>sense</sup>       |
| Ret_ex3-1_R      | AAACACGTGGTGGGAAAGTAAACA | Ret gRNA 3 oligo <sup>antisense</sup>   |
| Ret_ex5-1_F      | GTCGGAAGTGCATTCTCCCGAAA  | Ret gRNA 5-1 oligo <sup>sense</sup>     |
| Ret_ex5-1_R      | AAACTTTCGGGAGAATCGCAGTTC | Ret gRNA 5-1 oligo <sup>antisense</sup> |
| Ret_ex5-2_F      | GTCGGCCTCCAAGGACACACAATA | Ret gRNA 5-2 oligo <sup>sense</sup>     |
| Ret_ex5-2_R      | AAACTATTGTGTGTCCTTGGAGGC | Ret gRNA 5-2 oligo <sup>antisense</sup> |
| pCFD3_pcr_F      | GCCACCTACTCAGCCAAGAG     | Colony PCR screening                    |
| pCFD3_pcr_31_R   | CTAAAACACGTGGTGGGAAAG    | Colony PCR screening                    |
| pCFD3_pcr_51_R   | GAATCGCAGTTCCGACGTTA     | Colony PCR screening                    |
| pCFD3_pcr_52_R   | GGAGGCCGACGTTAAATTG      | Colony PCR screening                    |
| dU6-3:gRNA F     | ACCTACTCAGCCAAGAGGC      | 5` sequencing                           |
| dU6-3:gRNA R     | TGCATACGCATTAAGCGAAC     | 3` sequencing                           |
| Ret_ex3_CRISPR_F | TTCATTGATTGCGGCACAGTG    | Fly gDNA screening                      |
| Ret_ex3_CRISPR_R | CGTGATCCAAGGTTTGTCCG     | Fly gDNA screening                      |
| Ret_ex5_CRISPR_F | GGAGGCAAATGCTCACCTTG     | Fly gDNA screening                      |
| Ret_ex5_CRISPR_R | CAAGCCGCAATATCGAACGC     | Fly gDNA screening                      |

**Supplemental Table 2. DNA oligonucleotides used in this study.**



**Table S3. Quantification of embryonic phenotypes and larval mortality.**

Raw data with statistical analysis for larval feeding and mortality. Embryonic phenotypes: (FN: frontal nerve, FG: frontal ganglion, RN: recurrent nerve, EG: esophageal ganglia).

Measurements of axon length and branching in larval midgut nerves were derived from the Simple Neurite Tracer plugin in Image J and recorded as pixels, converted to millimeters and the branches per 0.1mm calculated. Statistics are shown in the boxes below. Larval gut motility was calculated by observing the number of contractions for a minute and a half. Statistical analysis is below.

[Click here to Download Table S3](#)
